# Supplementary material for: Development of a quantitative fluorescence-based ligand-binding assay
Source: PubMed Central journal article supplement (PMC4861924; doi:10.1038/srep25769), 2016-05-10
Supplement: srep25769-s1.pdf [file srep25769-s1.pdf]

# 1 Development of a quantitative fluorescence-based ligand- 2 binding assay

3 Conor J. Breen<sup>1,2,\*</sup>, Mathilde Raverdeau<sup>2</sup> & H. Paul Voorheis<sup>2</sup>

4 <sup>1</sup> Department of Biology, Maynooth University, Maynooth, Co. Kildare, Ireland

5 <sup>2</sup> School of Biochemistry and Immunology, Trinity Biomedical Sciences Institute, Trinity

6 College Dublin, Dublin 2, Ireland

7 \*Correspondence should be addressed to Conor J. Breen ([Conor.Breen@nuim.ie](mailto:Conor.Breen@nuim.ie))

8

## 9 Supplementary figures

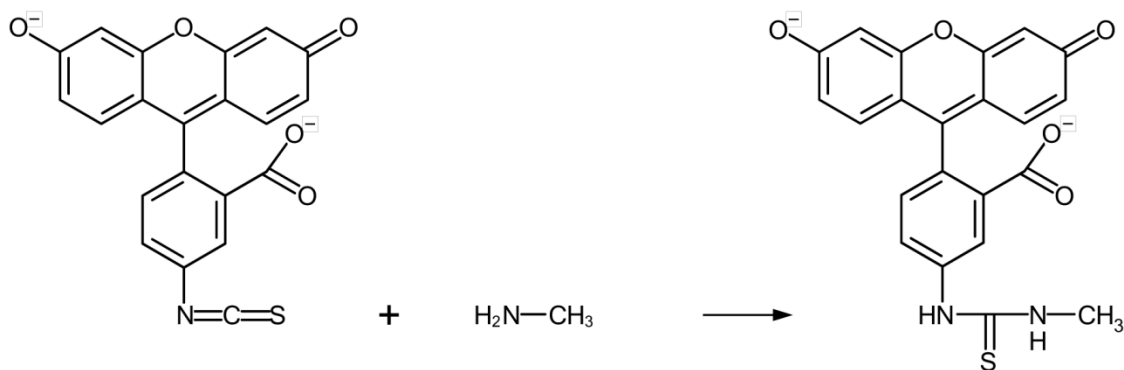

10

FITC

+

methylamine

→

FITC-methylamine

## 11 Supplementary Figure S1: The reaction between FITC and methylamine

12 The reaction between the isothiocyanate group of FITC and the primary amine of  
13 methylamine is shown in the figure. FITC is most commonly used to label proteins,  
14 where it reacts with the primary amines that are found both on both the side chains of  
15 lysine residues and at the N-terminus of the protein.

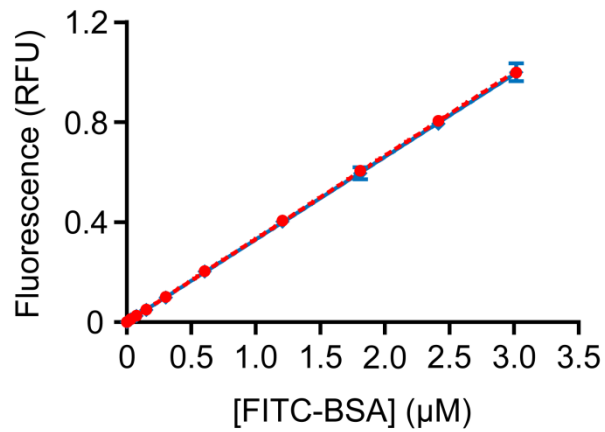

16

17 **Supplementary Figure S2: Proteolysis of FITC-BSA by an excess of pronase E is**

18 **unaffected by the presence of  $10^8$  trypanosomes.**

19 The calculated regression lines are shown through the fluorescence intensity data of

20 various concentrations of FITC-BSA that had been previously treated with pronase in the

21 absence (♦) and presence (●) of  $10^8$  trypanosomes. Data are the mean  $\pm$  S.D. of the

22 fluorescence intensity (n=3).

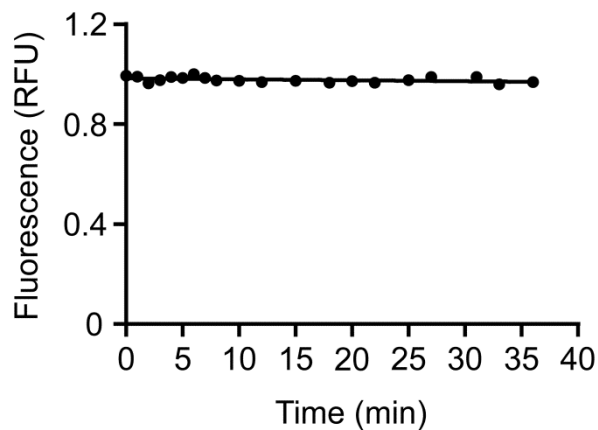

23

24 **Supplementary Figure S3: Fluorescence of FITC-methylamine is largely unaffected**

25 **by prolonged storage.**

26 Samples were taken regularly from a solution of FITC-methylamine, stored in the dark,

27 and their fluorescence intensities measured and plotted as a function of time. Data are the  
28 mean  $\pm$  S.D. of the fluorescence intensity (n=3).

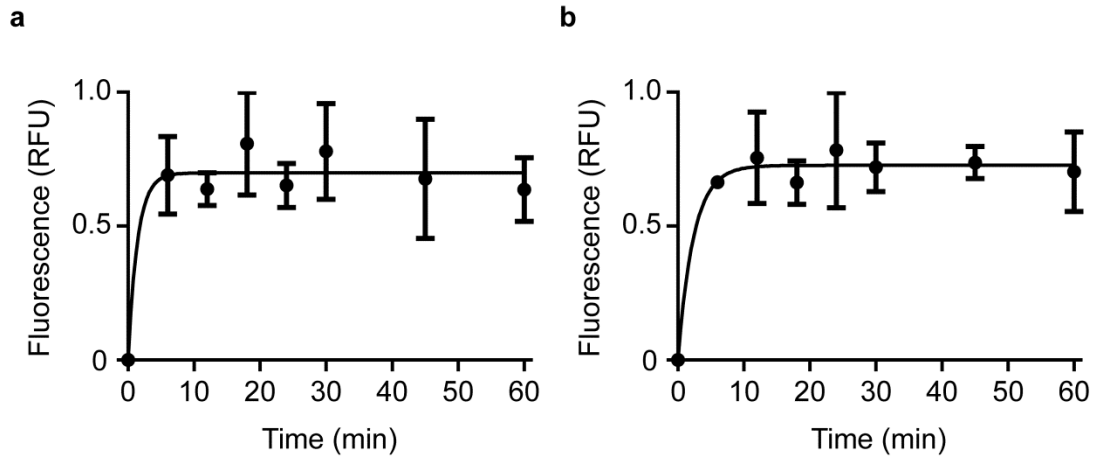

29

30 **Supplementary Figure S4: Time courses of binding of FITC-holotransferrin (a) and**  
31 **FITC-apotransferrin (b) to bloodstream form trypanosomes.**

32 Pseudo-first order kinetic models (equation 2) were fitted to the data (solid line) as  
33 indicated in Supplementary Methods. The time taken to reach 95% occupancy was  
34 calculated by solving the integrated form of the pseudo-first order rate equation (equation  
35 3).

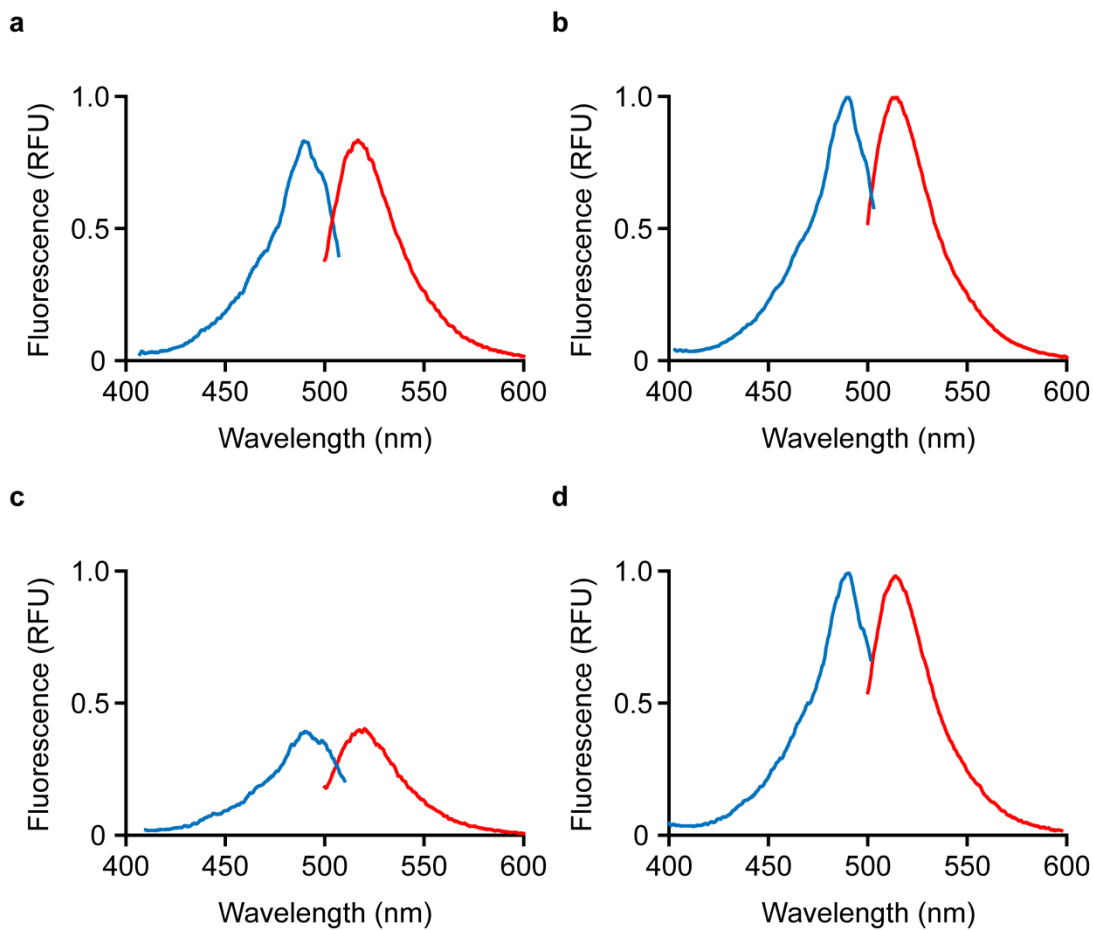

36

37 **Supplementary Figure S5: Excitation (blue trace) and emission (red trace) spectra**  
 38 **of FITC (a), FITC-methylamine (b), FITC-BSA (c), and proteolyzed FITC-BSA (d).**

39 Equal amounts of the fluorescein label were used between conditions. The wavelengths

40 of maximum excitation ( $\lambda_{exc}$ ) and emission ( $\lambda_{em}$ ) are summarized in **Table 1**.

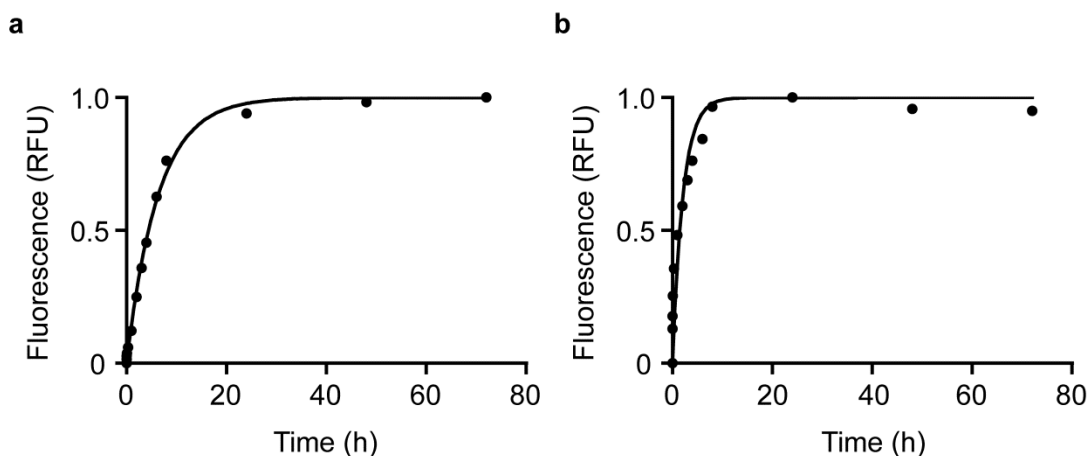

41

42 **Supplementary Figure S6: Time courses of the pseudo-first order proteolysis of**  
 43 **FITC-holotransferrin (a) and FITC-apotransferrin (b).**

44 Samples of 40  $\mu\text{g}$  of the FITC-conjugated protein were digested with 100  $\mu\text{g}$  of pronase  
 45 in the presence of 960  $\mu\text{g}$  of unlabeled BSA. Pseudo-first order kinetic models were fitted  
 46 to the data (solid line) as indicated in Supplementary Methods (equation 2). The time  
 47 taken to reach 95% proteolysis was then calculated by solving the integrated form of the  
 48 pseudo-first order rate equation (equation 3). Under the conditions described above, the  
 49 time taken to reach 95% proteolysis was 18.9 h for holotransferrin and 6.4 h for  
 50 apotransferrin.

51

52 **Supplementary Methods**

53 **Time courses of binding of FITC-holotransferrin and FITC-apotransferrin to**  
 54 **bloodstream form trypanosomes**

55 Bloodstream form trypanosomes ( $10^8$ ) were incubated with the FITC-conjugated protein  
 56 (2  $\mu\text{g}$ ) in ice-cold TES buffer (30 mM TES, 120 mM NaCl, 5 mM KCl, 16 mM  
 57  $\text{Na}_2\text{HPO}_4$ , 1.2 mM  $\text{KH}_2\text{PO}_4$ , 3 mM  $\text{MgSO}_4$ , 10 mM glucose, 0.1 mM adenosine; pH 7.4)

58 for various times. After incubation, the cells were centrifuged at  $12,000 \times g$  for 30 s and  
59 the supernatants aspirated to waste. The pellets of trypanosomes were resuspended in ice-  
60 cold TES buffer (1 mL) and washed once more in this manner. Following a third  
61 centrifugation step, the trypanosomes were finally resuspended in TES proteolysis buffer  
62 (30 mM TES, 140 mM NaCl, 4 mM KCl, 10 mM  $\text{CaCl}_2$ ; pH 7.5) containing pronase (100  
63  $\mu\text{g}/490 \mu\text{L}$ ) and then incubated in the dark for 72 h at  $37^\circ\text{C}$ . The proteolyzed samples  
64 were then diluted in Bicine-NaCl buffer (100 mM Bicine, 100 mM NaCl, pH 8.5) and  
65 their fluorescence intensities measured as previously described. Pseudo-first order  
66 reaction functions (equation 2) were fitted to the data from the time courses of binding:

67

$$68 \quad y = A(1 - e^{-kt}) \quad (2)$$

69

70 where A is the plateau and k is the pseudo-first order rate constant. The times taken to  
71 reach 95% occupancy were then calculated by solving the integrated form of the rate  
72 equation (equation 3) for 95% of the maximum fluorescence intensities:

73

$$74 \quad t_{95\%} = \frac{\ln(\frac{1}{0.05})}{k} \quad (3)$$

75

76 where k is the pseudo-first order rate constant.

77

### 78 **Time course of proteolysis of FITC-conjugated proteins by pronase**

79 FITC-holotransferrin and FITC-apotransferrin (100-fold initial molar excess of FITC)

80 were prepared as described in Methods. Both FITC-conjugated proteins (40  $\mu\text{g}$ ) were

81 proteolyzed in the presence of 960  $\mu\text{g}$  unlabeled BSA in proteolysis buffer (30 mM TES,  
82 140 mM NaCl, 4 mM KCl, 10 mM  $\text{CaCl}_2$ ; pH 7.5) containing pronase (100  $\mu\text{g}$ ), for 4  
83 days in the dark at 37°C. The reaction was terminated at various times by dilution into  
84 Bicine-NaCl buffer (100 mM Bicine, 100 mM NaCl; pH 8.5) at 0°C containing BSA (2  
85 mg/mL) and protease inhibitors (50 mM EDTA, 2 mM PMSF and 100  $\mu\text{g}/\text{mL}$  leupeptin,  
86 pH 8.5) and their fluorescence intensities measured as previously described. Pseudo-first  
87 order reaction functions were fitted to the data from the time courses of proteolysis as  
88 described above (equation 2). The times taken for the reactions to reach 95% completion  
89 were then calculated by solving the integrated form of the rate equation for 95% of the  
90 maximum fluorescence intensities as described above (equation 3).

91

## 92 **Excitation and emission spectra**

93 The maximum excitation and emission wavelengths of FITC, FITC-methylamine, FITC-  
94 BSA, and proteolyzed FITC-BSA were determined by serial dilution of each component  
95 into Bicine-NaCl buffer (100 mM Bicine, 100 mM NaCl, pH 8.5) and measuring the  
96 fluorescence intensities as described in Methods. The scan speed was 100 nm/min and the  
97 excitation and emission slit widths were set to 5 nm. All measurements were made at  
98 25°C.
